# Supplementary material
Source: publisher site journal article supplement (https://www.dovepress.com/get_supplementary_file.php?f=501775.docx)
Supplement: Supplementary file 1 [file get_supplementary_file.php]

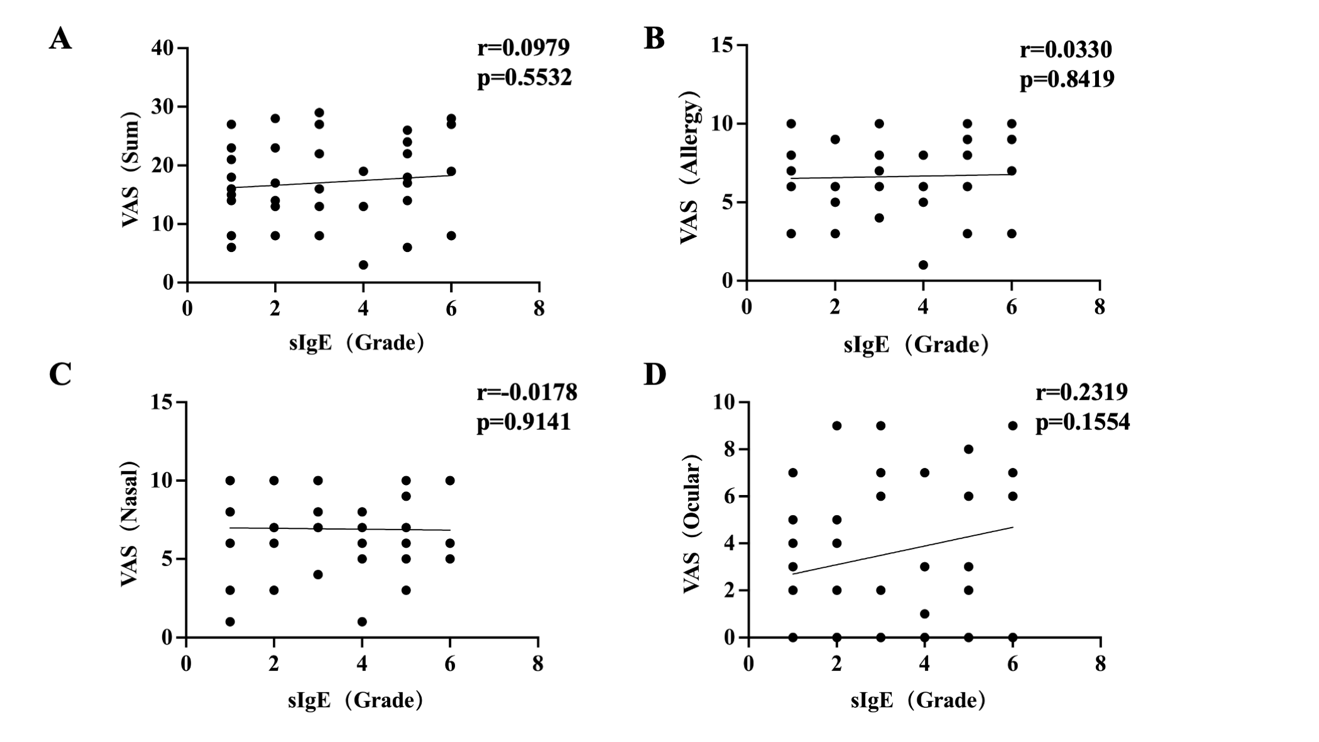


**Supplementary Figure 1.** Correlation analysis between sIgE levels and the VAS score in AR patients. . A. Correlation analysis between sIgE levels and the total VAS score. B. Correlation analysis between sIgE levels and the systemic allergy VAS score. C. Correlation analysis between sIgE levels and the VAS score for nasal symptoms. D. Correlation analysis between sIgE levels and the VAS score for ocular symptoms.
